## Subject Index (Vols 79–84)

- Abscission**  
calcium and polarity in plants: TREWAVAS, SEXTON & KELLY **83 Supplement**, 179
- Acheta domesticus***(See Cricket)
- Actin**  
changes in distribution during fertilization of mouse egg: MARO, JOHNSON, PICKERING & FLACH **81**, 211  
distribution in cytoplasm of mouse 8-cell blastomeres: JOHNSON & MARO **82**, 97
- Activation wave**  
structural basis in egg of *Xenopus laevis*: TAKEICHI & KUBOTA **81**, 1
- Actomyosin gel**  
in *Physarum* shuttle streaming: ODELL **83 Supplement**, 261
- Adhesion**  
of dermal cells during feather primordia development in chick skin: DAVIDSON **84**, 149
- Adrenergic cells**  
differentiation *in vitro* culture of mouse embryo: ITO & TAKEUCHI **84**, 49
- Aggregation**  
between preimplantation embryos and teratocarcinoma-derived cells: LEHTONEN, WARTIOVAARA & REIMA **81**, 17
- Aggregation chimaeras**  
in mouse – investigation of variability: WEST, BÜCHER, LINKE & DÜNNWALD **84**, 309
- Aleurone cells**  
gibberellins and gene control: BAULCOMBE, LAZARUS & MARTIENSSSEN **83 Supplement**, 119
- Alkaline phosphatase**  
activity in developing mouse spinal cord: KWONG & TAM **82**, 241
- Allantoic endoderm**  
implanted into presumptive digestive area in chick embryos: YASUGI **80**, 137
- Ambystoma mexicanum***  
cellular contributions to supernumerary limbs: MADEN & MUSTAFA **84**, 233  
*in vitro* development of isolated ectoderm from gastrulae: SLACK **80**, 321  
melanoid mutant  
pigmentary system: FROST, EPP & ROBINSON **81**, 127  
regional biosynthetic markers in early embryonic development: SLACK **80**, 289  
response of denervated axolotl arms to delayed amputation: WALLACE **84**, 303  
troponin-T in developing hearts: FULDER, LIM, GREASER & LEMANSKI **84**, 1  
wild type  
pigmentary system: FROST, EPP & ROBINSON **81**, 105
- Amphibia**  
anuran  
role of glycoconjugates in migration of germ cells: DELBOS, GIPOULOUX & SAIDI **82**, 119  
axolotl  
*in vitro* development of isolated ectoderm from gastrulae: SLACK **80**, 321  
morphogenesis of limb blastema – relationship between pattern and form: HOLDER & REYNOLDS **79**, 165  
*Pleurodeles waltl*  
blood  
cell ontogeny: DEPARIS & JAYLET **81**, 37
- Amplification**  
of ribosomal RNA genes during development: BOSTOCK **83 Supplement**, 7
- Amputation**  
response of denervated axolotl arms: WALLACE **84**, 303
- $\alpha$ -Amylase**  
gene families in wheat: BAULCOMBE, LAZARUS & MARTIENSSSEN **83 Supplement**, 119
- Antibody**  
responses and thymus implantation in *Xenopus*: GEARING, CRIBBIN & HORTON **84**, 287  
responses during postmetamorphic development in *Xenopus*: LALLONE, CHAMBERS & HORTON **84**, 191
- Antigen**  
differentiation of mouse spermatogenesis: BECHTOL **81**, 93
- Antisera**  
used to study differentiation of allantoic endoderm in avian embryos: YASUGI **80**, 137
- Apical ectodermal ridge (AER)**  
development in chick wing bud: TODT & FALLON **80**, 21  
effect on myogenic cell movements in

- avian limb bud: GUMPEL-PINOT, EDE & FLINT **80**, 105  
 induction in chick embryos: CARRINGTON & FALLON **84**, 19
- Apolipoprotein**  
 expression by murine yolk sac endoderm: SHI & HEATH **81**, 143
- Apoptosis**  
 associated with cavitation in teratocarcinoma-derived embryoid bodies: BOYD, HOOPER & WYLLIE **80**, 63
- Archenteron**  
 volume changes during embryogenesis of starfish: KOMINAMI **84**, 177
- Area opaca**  
 ultrastructure in gastrulating chick embryos: MILOS, ZALIK, SANDERS & LEDSHAM **83**, 43
- Area pellucida**  
 role of elongation in formation of somites of avian embryos: STERN & BELLAIRS **81**, 75
- Asialoglycoprotein receptor**  
 on isolated foetal rat hepatocytes: CONTI DEVIRGILIIS, DINI & RUSSO-CAIA **79**, 41
- Asterina pectinifera**  
 allocation of mesendodermal cells during early embryogenesis: KOMINAMI **84**, 177
- Autonomous cortical activity**  
 in mouse eggs controlled by cytoplasmic clock: WAKSMUNDZKA, KRYSIAK, KARASIEWICZ, CZOŁOWSKA & TARKOWSKI **79**, 77
- Avian**  
 embryo  
 exogenous glycosaminoglycans modulate skin differentiation: BECCHETTI, STABELLINI, CARUSO & CARINCI **82**, 25
- Axolotl**  
 cellular contributions to supernumerary limbs: MADEN & MUSTAFA **84**, 233  
 forelimb  
 regeneration of surgically created mixed-handed limbs: HOLDER & WEEKES **82**, 217  
*in vitro* development of isolated ectoderm from gastrulae: SLACK **80**, 321  
 larvae  
 skin-gland spacing pattern: HOLDER & GLADE **79**, 97  
 limb blastema  
 relationship between pattern and form: HOLDER & REYNOLDS **79**, 165  
 melanoid  
 mutant pigmentary system: FROST, EPP & ROBINSON **81**, 127  
 regional biosynthetic markers in early embryonic development: SLACK **80**, 289  
 wild type  
 pigmentary system: FROST, EPP & ROBINSON **81**, 105
- Bacteriophage lambda**  
 a programme for its construction: BRAMMAR & HADFIELD **83 Supplement**, 75
- Basement membrane**  
 adhesions during feather primordia development in chick skin: DAVIDSON **84**, 149  
 labelling in living chick embryo during gastrulation: SANDERS **79**, 113
- Beak**  
 of chick embryos – defects caused by retinoic acid: TAMARIN, CRAWLEY, LEE & TICKLE: **84**, 105
- Bile duct cells**  
 origin of in mouse embryos: SHIOJIRI **79**, 25
- Blastema formation**  
 in planarians: SALÓ & BAGUÑA **83**, 63
- Blastocyst**  
 trophoctodermal processes regulate ICM totipotency expression: FLEMING, WARREN, CHISHOLM & JOHNSON **84**, 63
- Blastomere**  
 mouse  
 distribution of cytoplasmic actin: JOHNSON & MARO **82**, 97
- Blood cell ontogeny**  
 role of endoderm in *Pleurodeles waltl*: DEPARIS & JAYLET **81**, 37
- Boneless forearms**  
 regeneration in *Xenopus laevis*: KORNELUK & LIVERSAGE **82**, 9
- Boundary shortening**  
 a procedure to test contraction in polygonal cell sheet: HONDA *et al.* **83 Supplement**, 313
- Budding**  
 of chimaeric hydra from normal and slow-budding strains: TAKANO & SUGIYAMA **80**, 155
- Bufo bufo**  
 role of glycoconjugates in migration of germ cells: DELBOS, GIPOULOUX & SAIDI **82**, 119

**Butterflies**

- wing patterns
  - single morphogen as a determining mechanism: BARD & FRENCH **84**, 255

***Caenorhabditis elegans***

- switch genes and sex determination: HODGKIN **83 Supplement**, 103

**Calcium**

- effect on wound healing in rat embryos: SMEDLEY & STANISSTREET **83**, 109
- polarity and abscission in plants: TREVAVAS, SEXTON & KELLY **83 Supplement**, 179

**Canine**

- ontogeny of haemopoietic progenitor cells (GM-CFC): NOTHDURFT, BRAASCH, CALVO, PRÜMMER, CARBONELL, GRILLI & FLIEDNER **80**, 87

**Cat**

- embryo development of muscle spindles: MILBURN **82**, 177

**Cavitation**

- of aggregates of chick extraembryonic endoderm cells: MILOS, ZALIK, SANDERS & LEDSHAM **83**, 43

**cDNA cloning**

- in *Chlamydomonas* gene expression induced by flagellar regeneration: SCHLOSS **83 Supplement**, 89

**Cell adhesion**

- in chick segmental plate resulting in meristic pattern: CHENEY & LASH **79**, 1

**Cell aggregative behaviour**

- of rat vibrissa dermal papilla *in vivo* and *in vitro*: JAHODA & OLIVER **79**, 211

**Cell behaviour**

- in a polygonal cell sheet: HONDA *et al.* **83 Supplement**, 313

**Cell cycle**

- analysis of facial mesenchyme in chick embryo: MINKOFF **81**, 49
  - MINKOFF & MARTIN **81**, 61
- in chick embryonic lens differentiation: ZWAAN & KENYON **84**, 331

**Cell death**

- associated with cavitation in teratocarcinoma-derived embryoid bodies: BOYD, HOOPER & WYLLIE **80**, 63
- during morphogenesis of digits of duck embryo webbed feet: HURLE & FERNANDEZ-TERAN **79**, 201
- during ridge induction in flank ectoderm of chick embryo: CARRINGTON & FALLON **84**, 19
- during syndactyly induced by Janus Green

B in chick leg bud: FERNANDEZ-TERAN & HURLE **84**, 159

in chick optic cup – evidence for new necrotic area: GARCÍA-PORRERO, COLVÉE & OJEDA **80**, 241

in development of apical ectodermal ridge in chick wing bud: TODT & FALLON **80**, 21

**Cell division**

during visual streak formation in the frog *Limnodynastes*: COLEMAN, DUNLOP & BEAZLEY **83**, 119

**Cell division**

model of using computer topological approach: RANSOM & MATELA **83 Supplement**, 233

**Cell interaction**

during embryogenesis of starfish: KOMINAMI **84**, 177

**Cell lineage**

in chimaeric hydra from normal and slow-budding strains: TAKANO & SUGIYAMA **80**, 155

**Cell marker**

for clonal analysis of mouse extraembryonic endoderm development: GARDNER **80**, 251

**Cell motility**

models using cytogels: OSTER **83 Supplement**, 329

**Cell movement**

in developing avian limb bud in presence and absence of AER: GÜMPEL-PINOT, EDE & FLINT **80**, 105

**Cell relationships**

during aggregation between mouse embryos and carcinoma (EC) cells: LEHTONEN, WARTIOVAARA & REIMA **81**, 17

**Chick****blastoderm**

effect of microtubule inhibitors on expansion of hypoblast: MAREEL, BELLAIRS, DE BRUYNE & VAN PETEGHEM **81**, 273

**embryo**

cavitation of aggregates of extraembryonic endoderm cells: MILOS, ZALIK, SANDERS & LEDSHAM **83**, 43

cell-cell adhesion in segmental plate: CHENEY & LASH **79**, 1

cell cycle analysis of facial mesenchyme: MINKOFF **81**, 49

MINKOFF & MARTIN **81**, 61

cell death in dorsal part of optic cup: GARCÍA-PORRERO, COLVÉE & OJEDA **80**, 241

- cell replication and differentiation in lens: ZWAAN & KENYON **84**, 331
- development of apical ectodermal ridge in wing bud: TODT & FALLON **80**, 21
- development of iris – a study using immunocytochemistry: FERRARI & KOCH **81**, 153
- differentiation of allantoic endoderm studied with antigens: YASUGI **80**, 137
- differentiation of irideal muscles *in vitro*: FERRARI & KOCH **81**, 169
- distribution of endocrine cell progenitors in the gut: RAWDON, KRAMER & ANDREW **82**, 129
- epithelial induction of osteogenesis in mandibular mesenchyme: VAN EXAN & HALL **79**, 225
- connective tissue differentiation in explanted somites: SWALLA & SOLURSH **79**, 243
- exogenous glycosaminoglycans modulate skin differentiation: BECCHETTI, STABELLINI, CARUSO & CARINCI **82**, 25
- haemoglobin and globin synthesis in isolated erythroid cells: SCHALEKAMP & VAN GOOR **84**, 125
- intestinal cytodifferentiation *in vitro* of endoderm: ISHIZUYA-OKA & MIZUNO **82**, 163
- labelling of basement membrane during gastrulation: SANDERS **79**, 113
- miniaturized somites: BELLAIRS & VEINI **79**, 183
- motor innervation of proximally rotated wing buds: LAING **83**, 213
- myogenic cell movement in presence and absence of AER: GUMPEL-PINOT, EDE & FLINT **80**, 105
- ridge induction in flank ectoderm: CARRINGTON & FALLON **84**, 19
- role of Hensen's node in somite formation: STERN & BELLAIRS **81**, 75
- SEM localization of cell-surface-associated fibronectin in cranium: MEIER & DRAKE **80**, 175
- spatially periodic patterns created by mechanical instability: HARRIS, STOKPAK & WARNER **80**, 1
- upper beak defects after treatment with retinoic acid: TAMARIN, CRAWLEY, LEE & TICKLE **84**, 105
- leg bud  
syndactyly induced by Janus Green B: FERNANDEZ-TERAN & HURLE **84**, 159
- skin  
development of feather primordia: DAVIDSON **84**, 149
- Chimaeras**  
between preimplantation embryos and teratocarcinoma-derived cells: LEHTONEN, WARTRIOVAARA & REIMA **81**, 17  
in hydra  
genetic analysis of developmental mechanisms: TAKANO & SUGIYAMA **80**, 155, mouse  
produced by aggregating embryos: WEST, BUCHER, LINKE & DUNN WALD **84**, 309
- Chlamydomonas**  
gene expression induced by flagellar regeneration: SCHLOSS **83 Supplement**, 89
- Chloroplast**  
development in higher plants – expression of Rubisco genes: ELLIS, GALLAGHER, JENKINS & LENNOX **83 Supplement**, 163
- Chondrogenesis**  
cell cycle analysis in chick embryo: MINKOFF & MARTIN **81**, 49  
in explanted chick somites: SWALLA & SOLURSH **79**, 243
- Chorion genes**  
in *Drosophila* – analysis of transcriptional regulation: KALFAYAN, WAKIMOTO & SPRADLING **83 Supplement**, 137
- Chromatophores**  
in developing wild-type axolotls: FROST, EPP & ROBINSON **81**, 105
- Chromosomes**  
and sex differentiation in eutherians: MÜLLER **83 Supplement**, 41  
changes during development: BOSTOCK **83 Supplement**, 7  
order – implications for development: HESLOP-HARRISON & BENNETT **83 Supplement**, 51
- Ciliates**  
genomic happenings – gene amplification and diminution: BOSTOCK **83 Supplement**, 7  
mutational analysis of patterning of *Tetrahymena* oral structures: FRANKEL *et al.* **82**, 41  
FRANKEL *et al.* **82**, 67
- Cinematography**  
of activation in egg of *Xenopus laevis*: TAKEICHI & KUBOTA **81**, 1
- Cleavage**  
DNA replication and gene expression in mouse embryos: BOLTON, OADES & JOHNSON **79**, 139

- Cleft palate**  
parallel with upper beak defects induced by retinoic acid in chick: TAMARIN, CRAWLEY, LEE & TICKLE **84**, 105
- Clonal analysis**  
of development of extraembryonic endoderm in the mouse: GARDNER **80**, 251
- Cnidaria**  
retinoids and pattern formation in a hydroid: MÜLLER **81**, 253
- Colour pattern**  
modification by coldshock in Lepidoptera: NIJHOUT **81**, 287
- Compaction**  
in mouse blastomeres – distribution of cytoplasmic actin: JOHNSON & MARO **82**, 97  
in preimplantation mouse embryos and microtubules: MARO & PICKERING **84**, 217
- Complement production**  
in *Xenopus* during postmetamorphic development: LALLONE, CHAMBERS & HORTON **84**, 191
- Compound eyes**  
in reduced-eye mutant of the grasshopper: EMERY, BELL, CHAPCO & STEEVES **83**, 189
- Computer modelling**  
of cell division during development: RANSOM & MATELA **83 Supplement**, 233
- Concanavalin A (Con A)**  
surface binding during fertilization of mouse eggs: MARO, JOHNSON, PICKERING & FLACH **81**, 211
- Connective tissue**  
differentiation in chick explanted somites: SWALLA & SOLURSH **79**, 243
- Contractile proteins**  
in developing heart of *Ambystoma*: FULDNER, LIM, GREASER & LEMANSKI **84**, 1
- Control mechanisms**  
in infective pathways of bacteriophage lambda: BRAMMAR & HADFIELD **83 Supplement**, 75
- Cortical activity**  
in mouse eggs controlled by a cytoplasmic clock: WAKSMUNDZKA, KRYSIAK, KARASIEWICZ, CZOŁOWSKA & TARKOWSKI **79**, 77
- Cortical histogenesis**  
in the ferret: MCSHERRY **81**, 239
- Coupling junctions**  
in preimplantation mouse embryos: GOODALL & JOHNSON **79**, 53
- Cranial neural crest**  
localization of fibronectin in chick embryos: MEIER & DRAKE **80**, 175
- Crawling**  
of cells – a model for lamellipodia: OSTER **83 Supplement**, 329
- Cricket**  
structure of supernumerary leg regenerates: FRENCH **81**, 185
- Culture**  
of explanted chick somites – differentiation of connective tissues: SWALLA & SOLURSH **79**, 243  
of isolated early mouse inner cell masses: NICHOLS & GARDNER **80**, 225  
of rat vibrissa dermal papilla cells: JAHODA & OLIVER **79**, 211  
of segmental plate mesoderm of snapping turtle embryos: PACKARD & MEIER **84**, 35
- Cuticle**  
*Drosophila*  
pattern formation in adults after irradiation of larval cells: MADHAVAN & MADHAVAN **82**, 1
- Cytochalasin B**  
effect on wound healing in rat embryos: SMEDLEY & STANISSTREET **83**, 109
- Cytochalasin D**  
effect on fertilization events in mouse egg: MARO, JOHNSON, PICKERING & FLACH **81**, 211  
effect on cytoplasmic actin distribution in mouse blastomeres: JOHNSON & MARO **82**, 97
- Cytogel**  
as a model for crawling of cells: OSTER **83 Supplement**, 329  
models of *Physarum* shuttle streaming: ODELL **83 Supplement**, 261
- Cytokeratins**  
as regional biosynthetic markers in early amphibian embryo: SLACK **80**, 289  
in *Xenopus* oocytes: GODSAVE, WYLIE, LANE & ANDERTON **83**, 157
- Cytoplasmic clock**  
controlling autonomous cortical activity in mouse eggs: WAKSMUNDZKA, KRYSIAK, KARASIEWICZ, CZOŁOWSKA & TARKOWSKI **79**, 77
- Cytoskeleton**  
role in control of intravitelline mitoses in *Drosophila* embryos: TOGASHI & OKADA **80**, 43

**Deoxyribose nucleic acid (DNA)**

methylation *versus* gene expression: BIRD  
**83 Supplement**, 31

replication in mouse embryos: BOLTON,  
OADES & JOHNSON **79**, 139

**Dermal papilla**

cell aggregative behaviour *in vivo* and *in vitro*: JAHODA & OLIVER **79**, 211

effects of wounding on hair growth in the rat: JAHODA & OLIVER **83**, 81  
JAHODA & OLIVER **83**, 95

**Descending contralateral movement detector (DCMD)**

in reduced-eye mutants of *Melanoplus*: EMERY, BELL, CHAPCO & STEEVES **83**, 189

**Determination**

mechanism in early development of axolotl embryos: SLACK **80**, 289

**Diffusion model**

for butterfly wing patterns: BARD & FRENCH **84**, 255

**Digestive tract**

differentiation *in vitro* of chick stomach endoderm: ISHIZUYA-OKA & MIZUNO **82**, 163

***Drosophila melanogaster***

analysis of transcriptional regulation of *s38* chorion gene: KALFAYAN, WAKIMOTO & SPRADLING **83 Supplement**, 137

differential gene amplification in polytene tissues: BOSTOCK **83 Supplement**, 7

**egg**

arrest of intravitelline mitoses by u.v. irradiation of surface: TOGASHI & OKADA **80**, 43

heat shock – a comparison with yeast: LINDQUIST **83 Supplement**, 147

**larval**

adult pattern blueprint in epidermal cells: MADHAVAN & MADHAVAN **82**, 1

models for segmentation: MEINHARDT **83 Supplement**, 289

**ovary**

differentiation markers: WHITE, PERRIMON & GEHRING **84**, 275

**Duck****embryo**

interdigital membranes during morphogenesis of webbed feet: HURLE & FERNANDEZ-TERAN **79**, 201

***Dugesia tigrina***

pattern of mitosis in anterior and posterior regeneration: SALÓ & BAGUÑA **83**, 63

**Ectoderm**

isolated from axolotl gastrulae – *in vitro* development: SLACK **80**, 321

**Egg****mouse**

autonomous cortical activity controlled by cytoplasmic clock: WAKS-

MUNDZKA, KRYSIAK, KARASIEWICZ, CZOŁOWSKA & TARKOWSKI **79**, 77

changes in actin distribution during fertilization: MARO, JOHNSON, PICKERING & FLACH **81**, 211

**EK cells**

effect on parthenogenetic development in mouse embryos: KAUFMAN, EVANS, ROBERTSON & BRADLEY **80**, 75

**Electrical control**

of abscission and plant development: TREWAVAS, SEXTON & KELLY **83 Supplement**, 179

**Electron microscope**

evidence for asialoglycoprotein receptors on rat hepatocytes: CONTI DEVIRGILIIS, DINI & RUSSO-CAIA **79**, 41

**Embryoid body**

mode of cell death associated with cavitation: BOYD, HOOPER & WYLLIE **80**, 63

**Embryonal carcinoma**

cells aggregated with preimplantation mouse embryos: LEHTONEN, WARTIOVAARA & REIMA **81**, 17

**Embryos*****Xenopus laevis***

intermediate filaments react with anti-mammalian vimentin antibodies: GODSAVE, ANDERTON, HEASMAN & WYLLIE **83**, 169

**Endocrine cells**

distribution of progenitor cells in chick gut: RAWDON, KRAMER & ANDREW **82**, 131

**Endoderm**

expression of apolipoprotein in mouse yolk sac: SHI & HEATH **81**, 143

role in blood cell ontogeny in *Pleurodeles waltl*: DEPARIS & JAYLET **81**, 37

use in chimaeras between embryo cells and embryonal carcinoma cells: LEHTONEN, WARTIOVAARA & REIMA **81**, 17

**Epiboly**

effect of microtubule inhibitors in chick blastoderm: MAREEL, BELLAIRS, DE BRUYNE & VAN PETEGHEM **81**, 273

**Epidermal cells**

blueprint for adult pattern in larval cells: MADHAVAN & MADHAVAN **82**, 1

- Epidermis**  
development from isolated ectoderm of axolotl gastrulae: SLACK **80**, 321
- Epimucin**  
as regional biosynthetic markers in early amphibian embryo: SLACK **80**, 289
- Epithelial induction**  
of osteogenesis in embryonic chick mandibular mesenchyme: VAN EXAN & HALL **79**, 225
- Epithelial-mesenchymal interaction**  
between allantoic endoderm and presumptive digestive area tissues: YASUGI **80**, 137
- Epithelio-mesenchymal interface**  
in embryonic chick leg buds: FERNANDEZ-TERAN & HURLE **84**, 159  
in interdigital membranes of webbed feet of duck embryo: HURLE & FERNANDEZ-TERAN **79**, 201
- Erythroid cells**  
of chick embryos - haemoglobin and globin synthesis: SCHALEKAMP & VAN GOOR **84**, 125
- Eutherians**  
chromosomes and sex differentiation: MÜLLER **83 Supplement**, 41
- Exocoelomic fluid**  
from cultures of rat conceptuses - a measure of yolk sac activity: HUXHAM & BECK **84**, 203
- External cells**  
heterogeneous differentiation in isolated mouse ICMs in culture: NICHOLS & GARDNER **80**, 225
- Extraembryonic cells**  
cavitation of aggregates from gastrulating chick embryos: MILOS, ZALIK, SANDERS & LEDSHAM **83**, 43
- Extraembryonic ectoderm**  
differentiation in isolated early mouse ICMs in culture: NICHOLS & GARDNER **80**, 225
- Extraembryonic endoderm**  
in mouse - an *in situ* cell marker for clonal analysis of development: GARDNER **80**, 251
- Eye**  
development of iris in chick embryo - immunocytochemical study: FERRARI & KOCH **81**, 153  
differentiation of chick irideal muscles *in vitro*: FERRARI & KOCH **81**, 169
- Facial mesenchyme**  
cell cycle analysis in chick embryo: MINKOFF **81**, 49  
MINKOFF & MARTIN **81**, 61
- Feather**  
development in chick skin: DAVIDSON **84**, 149  
formation  
effect of exogenous glycosaminoglycans on skin differentiation: BECCHETTI, STABELLINI, CARUSO & CARINCI **83**, 25
- Feather germs**  
spatially periodic patterns created by mechanical instability: HARRIS, STOPAK & WARNER **80**, 1
- Ferret**  
mapping of cortical histogenesis: McSHERRY **81**, 239
- Fertilization**  
of mouse egg - changes in actin distribution: MARO, JOHNSON, PICKERING & FLACH **81**, 211
- Fibre order**  
in normal *Xenopus* optic tract near the chiasma: FAWCETT, TAYLOR, GAZE, GRANT & HIRST **83**, 1
- Fibroblast traction**  
in feather germ pattern formation in chick embryos: HARRIS, STOPAK & WARNER **80**, 1
- Fibroblasts**  
of rat skin cultured *in vivo* and *in vitro*: JAHODA & OLIVER **79**, 211
- Fibronectin**  
associated with cell surface in chick embryo cranium: MEIER & DRAKE **80**, 175
- Field shape**  
and pattern formation in axolotl blastema: HOLDER & REYNOLDS **79**, 165
- Filaments**  
containing cytokeratin in *Xenopus* oocytes: GODSAVE, WYLIE, LANE & ANDERTON **83**, 157
- Flagellar regeneration**  
in *Chlamydomonas* - induction of gene expression: SCHLOSS **83 Supplement**, 89
- Flank ectoderm**  
response to ridge induction in chick embryo: CARRINGTON & FALLON **84**, 19
- Forelimb**  
regeneration in *Xenopus* after radius-ulna removal: KORNELUK & LIVERSAGE **82**, 9

**Frog***Limnodynastes dorsalis*

patterns of cell division during visual streak formation: COLEMAN, DUNLOP & BEAZLEY **83**, 119

**Gap junctions**

in preimplantation stages of mouse embryo: GOODALL & JOHNSON **79**, 53

**Gastrointestinal tract**

distribution of endocrine cell progenitors in chick: RAWDON, KRAMER & ANDREW **82**, 131

**Gastrula**

chick

control of somite segmentation: BELLAIRS & VEINI **79**, 183

**Gastrulation**

of chick embryo – labelling of basement membrane: SANDERS **79**, 113

of chick embryos: MILOS, ZALIK, SANDERS & LEDSHAM **83**, 43

**Gene**

control in cereal aleurone cells: BAULCOMBE, LAZARUS & MARTIENSSEN **83 Supplement**, 119

expression

cleavage and DNA replication in mouse embryos: BOLTON, OADES & JOHNSON **79**, 139

versus DNA methylation: BIRD **83 Supplement**, 31

localization

in *Xenopus laevis*: THIÉBAUD, COLOMBELLI & MÜLLER **83**, 33

**Genes**

involved in control of development in mouse embryo: JOHNSON, MCONNEL & VAN BLERKOM **83 Supplement**, 197

**Germ cell**

a cell-surface differentiation antigen of mouse spermatogenesis: BECHTOL **81**, 93

role of glycoconjugates in migration in anuran amphibia: DELBOS, GIPOULOUX & SAIDI **82**, 119

**Germline transformation**

in *Drosophila*: KALFAYAN, WAKIMOTO & SPRADLING **83 Supplement**, 137

**Gibberellins**

and gene control in cereal aleurone cells: BAULCOMBE, LAZARUS & MARTIENSSEN **83 Supplement**, 119

**Globin**

and haemoglobin synthesis in isolated

chick embryo erythroid cells: SCHALEKAMP & VON GOOR **84**, 125

**Glycolipids**

in early amphibian embryos: SLACK **80**, 289

**Glycoproteins**

as regional biosynthetic markers in early amphibian embryo: SLACK **80**, 289

**Glycosaminoglycans**

effect on avian skin differentiation: BECCHETTI, STABELLINI, CARUSO & CARINCI **82**, 25

**Gonadal proteins**

in developing eutherians: MÜLLER **83 Supplement**, 41

**Granulocyte progenitor cell (GM-CFC)**

ontogeny in the beagle dog: NOTHDURFT, BRAASCH, CALVO, PRÜMMER, CARBONELL, GRILLI & FLIEDNER **80**, 87

**Grasshopper**

reduced-eye mutant characteristics: EMERY, BELL, CHAPCO & STEEVES **83**, 189

**Gravity**

role in pattern formation in inverted *Xenopus* eggs: NEFF, WAKAHARA, JURAND & MALACINSKI **80**, 197

**Growth factors**

involved in differentiation of mouse embryonic kidney: THESLEFF & EKBLÖM **82**, 147

**Gynogenesis**

diploid – in *Xenopus laevis*: THIÉBAUD, COLOMBELLI & MÜLLER **83**, 33

**Haemoglobin**

and globin synthesis in isolated chick embryo erythroid cells: SCHALEKAMP & VAN GOOR **84**, 125

**Haemopoiesis**

in erythroid cells of chick embryos: SCHALEKAMP & VAN GOOR **84**, 125

**Haemopoietic progenitor cells (GM-CFC)**

ontogeny in the beagle dog: NOTHDURFT, BRAASCH, CALVO, PRÜMMER, CARBONELL, GRILLI & FLIEDNER **80**, 87

**Hair growth**

after wounding of vibrissa follicles in the rat: JAHODA & OLIVER **83**, 81  
JAHODA & OLIVER **83**, 95

**Heart development**

in *Ambystoma mexicanum*: FULDNER, LIM, GREASER & LEMANSKI **84**, 1

**Heat shock**

comparison of *Drosophila* and yeast: LINDQUIST **83 Supplement**, 147



**Hensen's node**

role in somite formation in avian embryo:  
STERN & BELLAIRS **81**, 75

**Hepatocytes**

differentiation into intrahepatic bile duct  
cells: SHIOJIRI **79**, 25

isolated from foetal rats—asialoglyco-  
protein receptors: CONTI DEVIRGILIIS,  
DINI & RUSSO-CAIA **79**, 41

**Histoblasts**

role in *Drosophila* adult cuticular pattern  
formation: MADHAVAN & MADHAVAN  
**82**, 1

**Histogenesis**

in cortex of ferret: McSHERRY **81**, 239

**Histogenetic capacity**

of caudal end of embryonic axis of the  
mouse: TAM **82**, 253

**Histology**

effects of wounding vibrissa follicles in  
rats: JAHODA & OLIVER **83**, 81

**Hormones**

distribution of endocrine cell progenitors  
in gut of chick embryos: RAWDON,  
KRAMER & ANDREW **82**, 131

**Hydra**

analysis of chimaeras from normal and  
slow-budding strains: TAKANO & SUGI-  
YAMA **80**, 155

**Hydractinia echinata**

retinoids and pattern formation in a  
hydroid: MÜLLER **81**, 253

**Hypoblast**

effect of microtubule inhibitors on  
expansion in chick blastoderm:  
MAREEL, BELLAIRS, DE BRUYNE & VAN  
PETEGHEM **81**, 273

**Identified neuron**

in leech nervous system: KUWADA **79**, 125

**IgG**

in cultures of rat conceptuses: HUXHAM &  
BECK **84**, 203

**Imaginal disc**

in *Drosophila* segmentation: MEINHARDT  
**83 Supplement**, 289

**Immunocytochemistry**

differentiation of chick irideal muscles *in*  
*vitro*: FERRARI & KOCH **81**, 169

study of development of iris in chick  
embryo: FERRARI & KOCH **81**, 153

**Immunoglobulin**

genes – rearrangements not involving gain  
or loss of DNA: BOSTOCK **83 Supple-**  
**ment**, 7

**Immunohistochemistry**

apolipoprotein expression by murine  
visceral yolk sac endoderm: SHI &  
HEATH **81**, 143

**Immunol latex microspheres**

used to locate fibronectin in chick embryo  
cranium: MEIER & DRAKE **80**, 175

**Implantation**

of thymus and antibody responses:  
GEARING, CRIBBIN & HORTON **84**, 287

**Induction**

of intestinal cytodifferentiation by chick  
duodenal mesenchyme: ISHIZUYA-OKA &  
MIZUNO **82**, 163

**Inner cell masses (ICM)**

isolated from mouse blastocysts: NICHOLS  
& GARDNER **80**, 225

trophectodermal processes regulate toti-  
potency expression in mouse: FLEMING,  
WARREN, CHISHOLM & JOHNSON **84**, 63

**Innervation**

of mystacial vibrissae in mouse embryo:  
WRENN & WESSELLS **83**, 137

of proximally rotated chick embryo wings:  
LAING **83**, 213

**Insect**

butterfly wing patterns: BARD & FRENCH  
**84**, 255

**cricket**

structure of supernumerary leg re-  
generates: FRENCH **81**, 185

**Intercalary regeneration**

models for positional signalling: MEIN-  
HARDT **83 Supplement**, 289

**Interdigital membrane**

during morphogenesis of digits of duck  
embryo webbed foot: HURLE & FERNAN-  
DEZ-TERAN **79**, 201

**Intermediate filaments**

in *Xenopus* oocytes: GODSAVE, WYLIE,  
LANE & ANDERTON **83**, 157

**Intrahepatic bile ducts**

origin of in mouse embryos: SHIOJIRI **79**,  
25

**Inverted eggs**

of *Xenopus* – cytoplasmic rearrangements  
after fertilization: NEFF, WAKAHARA,  
JURAND & MALACINSKI **80**, 197

**In vitro**

culture of rat visceral yolk sac: LU, SOBIS,  
VAN HOVE & VANDEPUTTE **80**, 127

culture of mouse embryonic kidney:  
THESLEFF & EKBLUM **82**, 147

development of *Xenopus laevis* – antibody  
responses: LALLONE, CHAMBERS & HOR-  
TON **84**, 191

- differentiation of rat testis: AGELOPOULOU, MAGRE, PATSAVOUDI & JOST **83**, 15
- Iris**  
differentiation of chick irideal muscles *in vitro*: FERRARI & KOCH **81**, 169  
immunocytochemical study of muscle differentiation in chick embryo: FERRARI & KOCH **81**, 153
- Irradiation**  
of *Drosophila larvae* – effect on adult pattern formation: MADHAVAN & MADHAVAN **82**, 1
- Keratinization**  
effect of exogenous glycosaminoglycans on skin differentiation: BECCHETTI, STABELLINI, CARUSO & CARINCI **82**, 25
- Kidney**  
role of transferrin in differentiation of mouse embryonic kidney: THESLEFF & EKBLOM **82**, 147
- Kinetics**  
of cell replication in embryonic chick lens: ZWAAN & KENYON **84**, 331
- Lambda**  
bacteriophage – a programme for its construction: BRAMMAR & HADFIELD **83 Supplement**, 75
- Lamellipodia**  
models using cytogels: OSTER **83 Supplement**, 329
- Lectins**  
role in migration of anuran amphibian germ cells: DELBOS, GIPOULOUX & SAIDI **82**, 119
- Leech**  
motor neuron  
normal and abnormal development: KUWADA **79**, 125
- Leg**  
cricket  
regeneration in cricket: FRENCH **81**, 185
- Lens**  
fibre formation in embryonic chicks: ZWAAN & KENYON **84**, 331
- Lepidoptera**  
colour pattern modification by coldshock: NIJHOUT **81**, 287
- Limb blastema**  
of axolotl – relationship between pattern and form: HOLDER & REYNOLDS **79**, 165
- Limb bud**  
cell movements in presence and absence of apical ectodermal ridge: GUMPEL-PINOT, EDE & FLINT **80**, 105
- Limb development**  
in chick embryo: CARRINGTON & FALLON **84**, 19  
of chick – apical ectodermal ridge in wing bud: TODT & FALLON **80**, 21  
of duck embryo: HURLE & FERNANDEZ-TERAN **79**, 201  
syndactyly induced by Janus Green B in chick: FERNANDEZ-TERAN & HURLE **84**, 159
- Limb regeneration**  
in axolotl – cellular contributions to supernumeraries: MADEN & MUSTAFA **84**, 233  
pattern formation in dorsal–ventral axis in axolotl: HOLDER & WEEKES **82**, 217
- Limnodynastes dorsalis**  
patterns of cell division during visual streak formation: COLEMAN, DUNLOP & BEAZLEY **83**, 119
- Liver**  
embryonic mouse  
origin of intrahepatic bile duct cells: SHIOJIRI **79**, 25
- Lysogenic pathways**  
in infective pathways of bacteriophage lambda: BRAMMAR & HADFIELD **83 Supplement**, 75
- Malic enzyme**  
as cell marker for clonal analysis of development in mouse: GARDNER **80**, 251
- Mammalian cells**  
gene amplification: BOSTOCK **83 Supplement**, 7
- Mammals**  
mapping of cortical histogenesis in the ferret: MCSHERRY **81**, 239  
ontogeny of haemopoietic progenitor cells (GM-CFC) in the dog: NOTHDURFT, BRAASCH, CALVO, PRÜMMER, CARBONELL, GRILLI & FLIEDNER **80**, 87
- Mandibular mesenchyme**  
epithelial induction of osteogenesis in chick embryos: VAN EXAN & HALL **79**, 225
- Mapping**  
of cortical histogenesis in the ferret: MCSHERRY **81**, 239
- Markers**  
of differentiation markers in *Drosophila*: WHITE, PERRIMON & GEHRING **84**, 275

- Mating-type locus**  
of yeast – rearrangements not involving gain or loss of DNA: BOSTOCK **83 Supplement**, 7
- Mechanical instability**  
model for generation of spatially periodic patterns: HARRIS, STOPAK & WARNER **80**, 1
- Melanocyte**  
differentiation *in vitro* culture of mouse embryo: ITO & TAKEUCHI **84**, 49
- Melanoid mutant**  
of axolotl – analysis of pigmentary system: FROST, EPP & ROBINSON **81**, 127
- Melanoplus sanguinipes**  
reduced-eye mutant characteristics: EMERY, BELL, CHAPCO & STEEVES **83**, 189
- Mesenchyme**  
cell cycle analysis in chick embryo: MINKOFF **81**, 49  
MINKOFF & MARTIN **81**, 61  
induction of chick intestinal tract *in vitro*: ISHIZUYA-OKA & MIZUNO **82**, 163  
chick embryonic  
epithelial induction of osteogenesis: VAN EXAN & HALL **79**, 225
- Mesoderm**  
formation of somites in avian embryos: STERN & BELLAIRS **81**, 75
- Messenger RNA**  
injected into mouse oocytes and ova: EBERT, PAYNTON, MCKNIGHT & BRINSTER **84**, 91
- Metamerism**  
in localization of fibronectin during development of chick cranium: MEIER & DRAKE **80**, 175
- 5-methylcytosine**  
repression of gene expression: BIRD **83 Supplement**, 31
- Methylation**  
of DNA *versus* gene expression: BIRD **83 Supplement**, 31
- MHC**  
-compatible and -incompatible thymus implants into *Xenopus*: GEARING, CRIBBIN & HORTON **84**, 287
- Microtubules**  
effect of inhibitors on expansion of hypoblast of chick blastoderms: MAREEL, BELLAIRS, DE BRUYNE & VAN PETEGHEM **81**, 273  
influence compaction in preimplantation mouse embryos: MARO & PICKERING **84**, 217
- Midbody**  
presence in preimplantation mouse embryo, role in communication: GOODALL & JOHNSON **79**, 53
- Migration**  
of anuran amphibian germ cells – role of glycoconjugates: DELBOS, GIPOULOUX & SAIDI **82**, 119  
of chick hypoblast cells – role of microtubule complex: MAREEL, BELLAIRS, DE BRUYNE & VAN PETEGHEM **81**, 273
- Mitosis**  
patterns in anterior and posterior regeneration in planarians: SALÓ & BAGUÑA **83**, 63
- Mitotic cycle**  
in *Drosophila* embryos after u.v. irradiation of egg surface: TOGASHI & OKADA **80**, 43
- Modelling**  
of cell division using a topological approach: RANSOM & MATELA **83 Supplement**, 233
- Mollusc**  
pigmentation patterns: MEINHARDT **83 Supplement**, 289
- Monoclonal antibodies**  
used in study of heart development in *Ambystoma*: FULDNER, LIM, GREASER & LEMANSKI **84**, 1  
used to provide differentiation markers in *Drosophila* ovary: WHITE, PERIMMON & GEHRING **84**, 275  
used to study cell-surface differentiation antigen of spermatogenesis: BECHTOL **81**, 93
- Morphogens**  
determining pigmentation patterns in butterfly wings: BARD & FRENCH **84**, 255
- Morula**  
mouse  
intercellular couplings: GOODALL & JOHNSON **79**, 53
- Mosaics**  
X-inactivation in mouse – variability: WEST, BUCHER, LINKE & DUNNWALD **84**, 309
- Motility**  
in a cell monolayer in culture: HONDA *et al.* **83 Supplement**, 313  
of cells – models using cytogels: OSTER **83 Supplement**, 329
- Motoneurons**  
of proximally rotated chick embryo wings: LAING **83**, 213

**Motor neuron**

in leech nervous system: KUWADA 79, 125

**Mouse****blastocysts**

culture of isolated inner cell masses: NICHOLS & GARDNER 80, 225  
trophectodermal processes regulate ICM totipotency expression: FLEMING, WARREN, CHISHOLM & JOHNSON 84, 63

**blastomere**

distribution of cytoplasmic actin: JOHNSON & MARO 82, 97

**chimaeras**

investigation of variability: WEST, BÜCHER, LINKE & DÜNNWALD 84, 309

**egg**

autonomous cortical activity controlled by cytoplasmic clock: WAKSMUNDZKA, KRYSIAK, KARASIE-WICZ, CZOŁOWSKA & TARKOWSKI 79, 77

changes in actin distribution during fertilization: MARO, JOHNSON, PICKERING & FLACH 81, 211

**embryo**

a cell-surface differentiation antigen of spermatogenesis: BECHTOL 81, 93

aggregation with teratocarcinoma-derived cells: LEHTONEN, WARTIOVAARA & REIMA 81, 17

apolipoprotein expression by yolk sac endoderm: SHI & HEATH 81, 143

cleavage, DNA replication and gene expression: BOLTON, OADES & JOHNSON 79, 139

differentiation *in vitro* of neural crest cells: ITO & TAKEUCHI 84, 49

early development of mystacial vibrissae: WRENN & WESSELLS 83, 137

effect of injected pluripotential cells on parthenogenetic development: KAUFMAN, EVANS, ROBERTSON & BRADLEY 80, 75

histogenetic capacity of caudal end of embryonic axis: TAM 82, 253

*in situ* marker for clonal analysis of extraembryonic endoderm: GARDNER 80, 251

intercellular couplings in preimplantation stages: GOODALL & JOHNSON 79, 53

microtubules influence compaction: MARO & PICKERING 84, 217

origin of intrahepatic bile duct cells: SHIOJIRI 79, 25

pattern of alkaline phosphatase activity in developing spinal cord: KWONG & TAM 82, 241

programmed development: JOHNSON, MCCONNEL & VAN BLERKOM 83 **Supplement**, 197

role of transferrin in differentiation of kidney: THESLEFF & EKBLOM 82, 147

**oocyte**

translation and stability of injected mRNA: EBERT, PAYNTON, MCKNIGHT & BRINSTER 84, 91

**muscle**

differentiation in chick embryo iris development: FERRARI & KOCH 81, 153

differentiation of chick irideal muscles *in vitro*: FERRARI & KOCH 81, 169

spindles – development in cat embryos: MILBURN 82, 177

**Muscle development**

in *Ambystoma mexicanum*: FULDNER, LIM, GREASER & LEMANSKI 84, 1

**Mutant****melanoid**

of axolotl – analysis of pigmentary system: FROST, EPP & ROBINSON 81, 127

*periodic albinism (a<sup>P</sup>)* in *Xenopus laevis* – localization of the gene: THIÉBAUD, COLOMBELLI & MÜLLER 83, 33

reduced-eye in *Melanoplus sanguinipes*: EMERY, BELL, CHAPCO & STEEVES 83, 189

**Mutations****intracellular**

affecting patterning of oral structures in *Tetrahymena*: FRANKEL *et al.* 82, 41  
FRANKEL *et al.* 82, 67

**Myogenic cells**

movement in developing avian limb bud: GUMPEL-PINOT, EDE & FLINT 80, 105

**Necrosis**

associated with cavitation in teratocarcinoma-derived embryoid bodies: BOYD, HOOPER & WYLLIE 80, 63

in chick optic cup development: GARCÍA-PORRERO, COLVÉE & OJEDA 80, 241

**Nematode**

switch genes and sex determination: HODGKIN 83 **Supplement**, 103

**Nerves**

role in regeneration of axolotl arms after delayed amputation: WALLACE 84, 303

- Nervous system**  
normal and abnormal development of an identified leech neurons: KUWADA **79**, 125
- Neural crest**  
differentiation *in vitro* of cells from mouse embryo: ITO & TAKEUCHI **84**, 49
- Neuron**  
identified in leech nervous system: KUWADA **79**, 125
- Nocodazole**  
effect on compaction in preimplantation mouse embryos: MARO & PICKERING **84**, 217  
effect on expansion of hypoblast and epiboly in chick blastoderm: MAREEL, BELLAIRS, DE BRUYNE & VAN PETEGHEM **81**, 273
- Nuclear architecture**  
implications for development: HESLOP-HARRISON & BENNETT **83 Supplement**, 51
- Ocelli**  
in reduced-eye mutant of the grasshopper: EMERY, BELL, CHAPCO & STEEVES **83**, 189
- Oocyte**  
mouse  
translation and stability of injected mRNA: EBERT, PAYNTON, MCKNIGHT & BRINSTER **84**, 91  
*Xenopus laevis*  
cytokeratin-containing filaments: GODSAVE, WYLIE, LANE & ANDERTON **83**, 157  
intermediate filaments react with anti-mammalian vimentin antibodies: GODSAVE, ANDERTON, HEASMAN & WYLIE **83**, 169
- Ooogenesis**  
differentiation markers in *Drosophila*: WHITE, PERRIMON & GEHRING **84**, 275
- Optic cup**  
evidence for new necrotic area in chick embryo: GARCÍA-PORRERO, COLVÉE & OJEDA **80**, 241
- Optic tract**  
fibre order in normal *Xenopus* near the chiasma: FAWCETT, TAYLOR, GAZE, GRANT & HIRST **83**, 1
- Oral apparatus**  
of *Tetrahymena* – mutational analysis of patterning: FRANKEL *et al.* **82**, 41  
FRANKEL *et al.* **82**, 67
- Order**  
of chromosomes – implications for development: HESLOP-HARRISON & BENNETT **83 Supplement**, 51
- Organ culture**  
differentiation of chick irideal muscles *in vitro*: FERRARI & KOCH **81**, 169  
of chick stomach endoderm in presence of duodenal mesenchyme: ISHIZUYA-OKA & MIZUNO **82**, 163  
of rat visceral yolk sac: LU, SOBIS, VAN HOVE & VANDEPUTTE **80**, 127
- Organogenesis**  
in mouse embryonic kidney: THESLEFF & EKBLUM **82**, 147  
in rat conceptuses cultured in rat and human sera: HUXHAM & BECK **84**, 203
- Osteogenesis**  
in embryonic chick mandibular mesenchyme: VAN EXAN & HALL **79**, 225
- Ova**  
mouse  
translation and stability of injected mRNA: EBERT, PAYNTON, MCKNIGHT & BRINSTER **84**, 91
- Pancreas**  
distribution of endocrine cell progenitors in gut of chick embryos: RAWDON, KRAMER & ANDREW **82**, 131
- Papilla cells**  
aggregative behaviour *in vivo* and *in vitro* culture: JAHODA & OLIVER **79**, 211
- Parthenogenetic embryos**  
influence of injected pluripotential (EK) cells: KAUFMAN, EVANS, ROBERTSON & BRADLEY **80**, 75
- Parthenogenetic activity**  
in mouse egg cortex: WAKSMUNDZKA, KRYSIAK, KARASIEWICZ, CZOŁOWSKA & TARKOWSKI **79**, 77
- Pattern formation**  
after fertilization of inverted *Xenopus* eggs: NEFF, WAKAHARA, JURAND & MALACINSKI **80**, 197  
and regeneration in planarians: SALÓ & BAGUÑA **83**, 63  
during regeneration of mixed-handed axolotl forelimb: HOLDER & WEEKES **82**, 217  
during ridge induction in flank ectoderm of chick embryo: CARRINGTON & FALLON **84**, 19  
effect of retinoids in a hydroid: MÜLLER **81**, 253

- in axolotl limb blastema: HOLDER & REYNOLDS **79**, 165
- in axolotl skin gland spacing: HOLDER & GLADE **79**, 97
- in butterfly wing pigmentation: BARD & FRENCH **84**, 255
- in chick segmental plate: CHENEY & LASH **79**, 1
- in *Drosophila* – do larval cells possess blueprint for adult?: MADHAVAN & MADHAVAN **82**, 1
- in early development of mystacial vibrissae in the mouse: WRENN & WESSELS **83**, 137
- in feather germs in chick embryos – mechanical instability model: HARRIS, STOPAK & WARNER **80**, 1
- in formation of somites in avian embryo: STERN & BELLAIRS **81**, 75
- in oral structures in *Tetrahymena*: FRANKEL *et al.* **82**, 41  
FRANKEL *et al.* **82**, 67
- in supernumerary limbs of axolotl: MADEN & MUSTAFA **84**, 233
- models for *Drosophila* segmentation and mollusc pigmentation: MEINHARDT **83 Supplement**, 289
- modification of colour pattern by coldshock in Lepidoptera: NIJHOUT **81**, 287
- Periodic albinism**  
localization of gene in *Xenopus laevis*: THIÉBAUD, COLOMBELLI & MÜLLER **83**, 33
- Phenocopy**  
colour pattern modification by coldshock in Lepidoptera: NIJHOUT **81**, 287
- Phosphoglycerate kinase (PGK-1)**  
in mouse aggregation chimaeras and X-inactivation mosaics: WEST, BÜCHER, LINKE & DÜNNWALD **84** 309
- Photoregulation**  
of biosynthesis of ribulose biphosphate carboxylase: ELLIS, GALLAGHER, JENKINS & LENNOX **83 Supplement**, 163
- Physarum polycephalum**  
shuttle streaming – modelled with mathematically generated cytogel: ODELL **83 Supplement**, 261
- Pigmentation patterns**  
of molluscs: MEINHARDT **83 Supplement**, 289
- Pigment cells**  
in developing wild-type axolotls: FROST, EPP & ROBINSON **81**, 105  
of melanoid phenotype axolotls: FROST, EPP & ROBINSON **81**, 127
- Planarian**  
pattern of mitosis in anterior and posterior regeneration: SALÓ & BAGUÑA **83**, 63
- Plasticity**  
in development of plants: TREWAVAS, SEXTON & KELLY **83 Supplement**, 179
- Pleurodeles waltl**  
blood cell ontogeny  
role of cell endoderm cells: DEPARIS & JAYLET **81**, 37
- Pluripotential cells (EK)**  
effect on parthenogenetic development in mouse embryos: KAUFMAN, EVANS, ROBERTSON & BRADLEY **80**, 75
- Polarity**  
calcium and abscission in plants: TREWAVAS, SEXTON & KELLY **83 Supplement**, 179
- Polarization**  
in mouse blastomeres – role of actin: JOHNSON & MARO **82**, 97
- Polyadenylation**  
and transcription in early quail embryo: OLSZAŃSKA, KLUDKIEWICZ & LASSOTA **79**, 11
- Polygonal sheet**  
cell behaviour in cell cultures: HONDA *et al.* **83 Supplement**, 313
- Polypeptides**  
in sex differentiation of eutherians: MÜLLER **83 Supplement**, 41
- Positional information**  
in segmentation and pigmentation patterns of molluscs: MEINHARDT **83 Supplement**, 289
- Precis coenia**  
colour pattern modification by coldshock: NIJHOUT **81**, 287
- Preprogramming**  
in control of somite segmentation in chick gastrula: BELLAIRS & VEINI **79**, 183
- Primitive streak**  
formation of somites in avian embryos: STERN & BELLAIRS **81**, 75  
of mouse – histogenetic capacity of tissues: TAM **82**, 253
- Programmes**  
for development in mouse embryo: JOHNSON, MCCONNELL & VAN BLERKOM **83 Supplement**, 197
- Propagating waves**  
role in pattern formation in *Drosophila* and molluscs: MEINHARDT **83 Supplement**, 289

- Protein**  
transport  
in cultures of rat embryos: HUXHAM & BECK **84**, 203
- Protozoa**  
mutational analysis of patterning of *Tetrahymena* oral structures: FRANKEL *et al.* **82**, 41  
FRANKEL *et al.* **82**, 67
- Pteridines**  
in developing wild-type axolotls: FROST, EPP & ROBINSON **81**, 105  
of melanoid phenotype axolotls: FROST, EPP & ROBINSON **81**, 127
- Quail**  
allantoic endoderm  
implanted into presumptive digestive area in chick: YASUGI **80**, 137  
embryo  
transcription and polyadenylation processes: OLSZAŃSKA, KLUDKIEWICZ & LASSOTA **79**, 11
- Radius**  
removal in *Xenopus* – effect on regeneration: KORNELUK & LIVERSAGE **82**, 9
- Rana dalmatina**  
role of glycoconjugates in migration of germ cells: DELBOS, GIPOULOUX & SAIDI **82**, 119
- Rat**  
dermal papillae  
aggregative behaviour *in vivo* and *in vitro*: JAHODA & OLIVER **79**, 211  
embryo  
exocoelomic fluid protein from cultured conceptuses: HUXHAM & BECK **84**, 203  
scanning electron microscopy of wound healing: SMEDLEY & STANISSTREET **83**, 109  
foetus and adult  
asialoglycoprotein receptors on isolated hepatocytes: CONTI DEVIRGILIIS, DINI & RUSSO-CAIA **79**, 41  
hair growth characteristics following wounding of follicles: JAHODA & OLIVER **83**, 81  
histology of hair growth following wounding of follicles: JAHODA & OLIVER **83**, 95  
testis  
initial phases of differentiation *in vitro*: AGELOPOULOU, MAGRE, PATSAVOUDI & JOST **83**, 15  
visceral yolk sac  
differentiation potentiality in organ culture: LU, SOBIS, VAN HOVE & VANDEPUTTE **80**, 127
- Reconstruction**  
of serial electron micrographs of chromosomes: HESLOP-HARRISON & BENNETT **83 Supplement**, 51
- Regeneration**  
and pattern formation in planarians: SALÓ & BAGUÑA **83**, 63  
forelimb  
effects of radius-ulna removal in *Xenopus* froglets: KORNELUK & LIVERSAGE **82**, 9  
in a hydroid – effect of retinoids on pattern formation: MÜLLER **81**, 253  
of axolotl arms after delayed amputation: WALLACE **84**, 303  
of supernumerary legs in the cricket: FRENCH **81**, 185  
of surgically created mixed-handed axolotl forelimbs: HOLDER & WEEKES **82**, 217
- Regression**  
of Hensen's node – role in formation of somites in avian embryo: STERN & BELLAIRS **81**, 75
- Regulation mechanism**  
for intravitelline mitoses in *Drosophila* embryos: TOGASHI & OKADA **80**, 43
- Replication**  
of DNA in mouse embryos: BOLTON, OADES & JOHNSON **79**, 139
- Retina**  
development in the frog *Limnodynastes*: COLEMAN, DUNLOP & BEAZLEY **83**, 119  
evidence for new necrotic area in chick optic cup: GARCÍA-PORRERO, COLVÉE & OJEDA **80**, 241
- Retinoic acid**  
upper beak defects in chick embryos: TAMARIN, CRAWLEY, LEE & TICKLE **84**, 105
- Retinoids**  
and pattern formation in a hydroid: MÜLLER **81**, 253
- Retinotopy**  
in *Xenopus*: FAWCETT, TAYLOR, GAZE, GRANT & HIRST **83**, 1
- Reversal**  
of chick embryonic lens affects cell replication & differentiation: ZWAAN & KENYON **84**, 331
- Ribonucleic acid (RNA)**  
abundance in *Chlamydomonas* gene

- expression induced by flagellar regeneration: SCHLOSS **83 Supplement**, 89
- during early development of quail embryo – mRNA and tRNA: OLSZAŃSKA, KLUDKIEWICZ & LASSOTA **79**, 11
- messenger
- effects of gibberellins in cereal aleurone cells: BAULCOMBE, LAZARUS & MARTIENSSEN **83 Supplement**, 119
  - increase during chloroplast development in higher plants: ELLIS, GALLAGHER, JENKINS & LENNOX **83 Supplement**, 163
  - injected into mouse oocytes and ova: EBERT, PAYNTON, MCKNIGHT & BRINSTER **84**, 91
- Ribulose biphosphate carboxylase**
- role in photoregulation in higher plants: ELLIS, GALLAGHER, JENKINS & LENNOX **83 Supplement**, 163
- Rotation**
- of chick embryos wing buds: LAING **83**, 213
- Rubisco gene**
- expression during greening of *Pisum* seedlings: ELLIS, GALLAGHER, JENKINS & LENNOX **83 Supplement**, 163
- Scanning electron microscopy (SEM)**
- of activation wave in egg of *Xenopus laevis*: TAKEICHI & KUBOTA **81**, 1
  - of somitomeric organization in snapping turtle embryos: PACKARD & MEIER **84**, 35
  - of wound healing in rat embryos: SMEDLEY & STANISSTREET **83**, 109
  - study of development of iris in chick embryo: FERRARI & KOCH **81**, 153
- Segmentation**
- control in gastrula stages of the chick embryo: BELLAIRS & VEINI **79**, 183
- Segmental plate**
- of chick – increase in cell–cell adhesion results in meristic pattern: CHENEY & LASH **79**, 1
  - somitomeric organization in snapping turtle embryos: PACKARD & MEIER **84**, 35
- Sertoli cells**
- differentiation of rat testis: AGELOPOULOU, MAGRE, PATSAVOUDI & JOST **83**, 15
- Sex determination**
- and switch genes in nematodes: HODGKIN **83 Supplement**, 41
- Shuttle streaming**
- in *Physarum* – modelled using cytogel properties: ODELL **83 Supplement**, 261
- Skin**
- avian
    - effect of exogenous glycosaminoglycans on skin differentiation: BECCHETTI, STABELLINI, CARUSO & CARINCI **82**, 25
    - development of feather primordia in chick: DAVIDSON **84**, 149
- Skin glands**
- in axolotl – formation of spacing pattern: HOLDER & GLADE **79**, 97
- Somite**
- differentiation of connective tissue in chick: SWALLA & SOLURSH **79**, 243
  - segmentation
    - in chick gastrula: BELLAIRS & VEINI **79**, 183
    - in avian embryos – role of node regression and elongation: STERN & BELLAIRS **81**, 75
- Somitogenesis**
- in chick embryo segmental plate: CHENEY & LASH **79**, 1
- Somitomere**
- organization in segmental plate in turtle embryos: PACKARD & MEIER **84**, 35
- Spacing pattern**
- in axolotl skin glands: HOLDER & GLADE **79**, 97
- Spermatogenesis**
- in mouse – a cell-surface differentiation antigen: BECHTOL **81**, 93
- Spinal cord**
- of mouse – pattern of alkaline phosphatase activity: KWONG & TAM **82**, 241
- Spindles**
- development in cat muscles: MILBURN **82**, 177
- Starfish**
- allocation of mesendodermal cells during early embryogenesis: KOMINAMI **84**, 177
- Stem cells**
- development in blood of *Pleurodeles waltl*: DEPARIS & JAYLET **81**, 37
- Striated border**
- induced *in vitro* in chick stomach endoderm by duodenal mesenchyme: ISHIZUYA-OKA & MIZUNO **82**, 163
- Sucrase**
- induced *in vitro* in chick stomach endoderm by duodenal mesenchyme: ISHIZUYA-OKA & MIZUNO **82**, 163



- Supernumerary leg**  
structure in the cricket: FRENCH **81**, 185
- Switch**  
evidence for non-clonal mechanism at the embryonic haemoglobin switch: SCHALEKAMP & VAN GOOR **84**, 125
- Switch genes**  
and sex determination in nematodes: HODGKIN **83 Supplement**, 103
- Symmetrization**  
of inverted *Xenopus* eggs: NEFF, WAKAHARA, JURAND & MALACINSKI **80**, 197
- Syndactyly**  
induced by Janus Green B in embryonic chick leg bud: FERNANDEZ-TERAN & HURLE **84**, 159
- Tail bud**  
of mouse – histogenetic capacity of tissues: TAM **82**, 253
- Taxol**  
effect on compaction in preimplantation mouse embryos: MARO & PICKERING **84**, 217
- Teratocarcinoma**  
-derived embryoid bodies – mode of cell death during cavitation: BOYD, HOOPER & WYLLIE **80**, 63
- Terminal differentiation**  
in chick embryonic lens: ZWAAN & KENYON **84**, 331
- Testis**  
differentiation in rat embryos *in vitro*: AGELOPOULOU, MAGRE, PATSAVOUDI & JOST **83**, 15
- Tetrahymena thermophila**  
mutational analysis of patterning of oral structures: FRANKEL *et al* **82**, 41  
FRANKEL *et al.* **82**, 67
- Thymus**  
implantation and antibody responses in *Xenopus*: GEARING, CRIBBIN & HORTON **84**, 287
- Tissue interaction**  
during development of feather primordia in chick skin: DAVIDSON **84**, 149
- Topological approach**  
to computer modelling of cell division: RANSOM & MATELA **83 Supplement**, 233
- Totipotency**  
in ICM of mouse expanding blastocyst: FLEMING, WARREN, CHISHOLM & JOHNSON **84**, 63
- Transcription**  
and polyadenylation processes in quail embryos: OLSZAŃSKA, KLUDKIEWICZ & LASSOTA **79**, 11  
of genes may be controlled by methylation: BIRD **83 Supplement**, 31
- Transcriptional control**  
during infective pathways of bacteriophage lambda: BRAMMAR & HADFIELD **83 Supplement**, 75  
in *Chlamydomonas* gene expression induced by flagellar regeneration: SCHLOSS **83 Supplement**, 89  
in photoregulation in higher plants: ELLIS, GALLAGHER, JENKINS & LENNOX **83 Supplement**, 163  
of chorion gene of *Drosophila*: KALFAYAN, WAKIMOTO & SPRADLING **83 Supplement**, 137
- Transferrin**  
in cultures of rat conceptuses: HUXHAM & BECK **84**, 203  
role in differentiation of mouse embryonic kidney: THESLEFF & EKBLOM **82**, 147
- Transfilter tissue recombinations**  
study of epithelial induction of osteogenesis in chick embryo mandible: VAN EXAN & HALL **79**, 225
- Translation**  
and stability of injected mRNA in mouse oocytes and ova: EBERT, PAYNTON, MCKNIGHT & BRINSTER **84**, 91
- Triploid cells**  
in supernumerary limbs of axolotl: MADEN & MUSTAFA **84**, 233
- Trophectoderm**  
differentiation in isolated early mouse ICMs in culture: NICHOLS & GARDNER **80**, 225  
processes regulate ICM totipotency expression in mouse blastocysts: FLEMING, WARREN, CHISHOLM & JOHNSON **84**, 63
- Troponin-T**  
accumulation and localization in heart of *Ambystoma*: FULDNER, LIM, GREASER & LEMANSKI **84**, 1
- Turtle**  
embryo  
somitomic organization of the segmental plate: PACKARD & MEIER **84**, 35
- Vanessa species**  
colour pattern modification by coldshock: NIJHOUT **84**, 287

**Vibrissae**

dermal papilla cell aggregative behaviour  
*in vivo* and *in vitro*: JAHODA & OLIVER  
**79, 211**

early development of whiskers in the  
mouse embryo: WRENN & WESSELLS **83,**  
**137**

effects of wounding on hair growth:  
JAHODA & OLIVER **83, 81**

**Vimentin**

intermediate filaments in *Xenopus*  
stained by anti-vimentin antibodies:  
GODSAVE, ANDERTON, HEASMAN & WYLIE  
**83, 169**

**Visceral yolk sac**

of rat in organ culture: LU, SOBIS, VAN  
HOVE & VANDEPUTTE **80, 127**

**Visual streak**

formation in the frog *Limnodynastes*:  
COLEMAN, DUNLOP & BEAZLEY **83, 119**

**Visual staining**

of chick optic cup – evidence for new  
necrotic area: GARCÍA-PORRERO, COL-  
VÉE & OJEDA **80, 241**

**Vitamin A**

effect on pattern formation in axolotl  
blastema: HOLDER & REYNOLDS **79, 165**

**Wheat**

gibberellins and gene control in aleurone  
cells: BAULCOMBE, LAZARUS & MARIENS-  
SEN **83 Supplement, 119**

**Whiskers**

early development of mystacial vibrissae  
in the mouse: WRENN & WESSELLS **83,**  
**137**

**Wing bud**

chick  
motor innervation after proximal  
reversal: LAING **83, 213**

development of apical ectodermal ridge in  
chick: TODT & FALLON **80, 21**

induction in chick embryos: CARRINGTON  
& FALLON **84, 19**

**Wound healing**

in rat embryos – scanning electron  
microscopy: SMEDLEY & STANISSTREET  
**83, 109**

**Wounding**

effects on hair growth in the rat: JAHODA  
& OLIVER **83, 81**

JAHODA & OLIVER **83, 95**

***Xenopus laevis***

egg  
cytoplasmic rearrangements after ferti-

lization of inverted eggs: NEFF,  
WAKAHARA, JURAND & MALACINSKI  
**80, 197**

diploid gynogenesis and localization of  
periodic albinism gene: THIÉBAUD,  
COLOMBELLI & MÜLLER **83, 33**

**egg**

structural basis of activation wave:  
TAKEICHI & KUBOTA **81, 1**

**embryo**

intermediate filaments react with anti-  
mammalian vimentin antibodies: GOD-  
SAVE, ANDERTON, HEASMAN & WYLIE **83,**  
**169**

**froglet**

effects of radius-ulna removal on  
forelimb regeneration: KORNELUK &  
LIVERSAGE: **82, 9**

haemolytic antibody response during  
postmetamorphic development: LAL-  
LONE, CHAMBERS & HORTON **84, 191**

**larva**

fibre order in normal optic tract near  
the chiasma: FAWCETT, TAYLOR,  
GAZE, GRANT & HIRST **83, 1**

**oocyte**

appearance and distribution of cyto-  
keratin-containing filaments: GOD-  
SAVE, WYLIE, LANE & ANDERTON **83, 157**

intermediate filaments react with anti-  
mammalian vimentin antibodies:  
GODSAVE, ANDERTON, HEASMAN &  
WYLIE **83, 169**

role of glycoconjugates in migration of  
germ cells: DELBOS, GIPOULOUX & SAIDI  
**82, 119**

thymus implantation and antibody  
responses: GEARING, CRIBBIN & HORTON  
**84, 287**

**X-inactivation mosaics**

investigation of variability: WEST,  
BÜCHER, LINKE & DÜNNWALD **84, 309**

**Yeast**

heat shock – a comparison with *Droso-*  
*phila*: LINDQUIST **83 Supplement, 147**

**Yolk platelets**

distribution in inverted *Xenopus* eggs  
following fertilization: NEFF, WAKA-  
HARA, JURAND & MALACINSKI **80, 197**

**Yolk sac**

activity in cultured rat embryos: HUXHAM  
& BECK **84, 203**

**Yolk sac endoderm**

expression of apolipoprotein in the  
mouse: SHI & HEATH **81, 143**
